1 **Title: long-term benefits of breastfeeding on brain and body development among 9–10-year-olds:**  
2 **modulated by socioeconomic environment**

3 <sup>1</sup>Vidya Rajagopalan PhD, <sup>2</sup> Eustace Hsu PhD, <sup>2,3,4,5</sup> Shan Luo\* PhD

4

5 <sup>1</sup> Department of Radiology, Children’s Hospital Los Angeles, Keck School of Medicine, University of Southern  
6 California, Los Angeles, CA, USA

7 <sup>2</sup>Division of Endocrinology and Diabetes, Department of Medicine, Keck School of Medicine, University of  
8 Southern California, Los Angeles, CA, USA

9 <sup>3</sup>Diabetes and Obesity Research Institute, Keck School of Medicine, University of Southern California, Los  
10 Angeles, CA, USA

11 <sup>4</sup>Department of Psychology, University of Southern California, Los Angeles, CA 90089, USA

12 <sup>5</sup>Center for Endocrinology, Diabetes and Metabolism, Children’s Hospital Los Angeles, Los Angeles, CA, USA

13

14 \*Correspondence and reprint requests can be made to Dr. Shan Luo, PhD, Assistant Professor of  
15 Medicine, USC Keck School of Medicine, Division of Endocrinology and Diabetes, Diabetes and Obesity  
16 Research Institute, 2250 Alcazar Street; CSC 215, Los Angeles, CA 90089.

17 **Email:** [shanluo@usc.edu](mailto:shanluo@usc.edu)

18 **Phone:** 323-865-1750

19

20

21 **Key words:** breastfeeding, brain structure, socioeconomic environment

22

23 **Manuscript word count: 2387**

24

25

26 **Key Points**

27

28 **Question:** Do benefits of breastfeeding(bf), on children's brain and body development, persist long-term  
29 and are these benefits uniform across socioeconomic environments (SEEs)?

30 **Findings:** Longer bf duration is associated with lower adiposity, greater cortical and subcortical gray  
31 matter volume, and cortical surface area in 9–10-year-old children. Children from lower SEEs showed  
32 stronger negative relationships between bf duration and adiposity. Children across all SEEs demonstrated  
33 positive relationships between bf duration and surface area.

34 **Meaning:** Our results imply that long-term benefits to child brain and body development increase with bf  
35 duration; and children from lower SEEs benefited more from longer bf duration.

36

37

38

39

40

41

42

43

44

45

46

47

48

49

50

51

52

53 **Abstract**

54 **Importance:** It is yet unknown if breastfeeding (bf) benefits, to brain and body development of children,  
55 persist into peri-adolescence and vary by socioeconomic environments (SEEs).

56 **Objective:** We aim to investigate SEE-independent and SEE-modulated relationships between bf  
57 duration and child brain structure and adiposity markers during peri-adolescence.

58 **Design, setting and participants:** This was a cross-sectional study of children aged 9–10 enrolled in the  
59 multi-center Adolescent Brain and Cognitive Development (ABCD) Study®.

60 **Exposure(s):** Bf duration was self-reported. Neighborhood-level SEE was assessed using area  
61 deprivation index (ADI).

62 **Main Outcome(s):** T1-weighted magnetic resonance imaging was used to assess global brain measures:  
63 volumes of white, cortical, and subcortical gray matter (GM), cortical thickness, and surface area (SA).  
64 Adiposity markers included age- and sex-specific body mass index (BMI *z*-scores), waist circumference,  
65 and waist-to-height ratio (WHtR). Mixed effects models examined associations of bf duration with brain  
66 structure and adiposity markers controlling for sociodemographic, pre- and post-natal covariates.  
67 Stratified analysis was performed by tertiles of ADI.

68 **Results:** The sample consisted of 7,511 children (51.7% males; 18.8% no bf, 35.3% 1-6 months, 24.9%  
69 7-12 months, 21.0% >12 months). Child's total SA ( $\beta$  (95% CI) = 0.053 (0.033, 0.074); FDR corrected  
70  $P < 0.001$ ), cortical ( $\beta$  (95% CI) = 0.021 (0.010, 0.032); FDR corrected  $P < 0.001$ ) and subcortical GM  
71 volume ( $\beta$  (95% CI) = 0.016 (0.003, 0.030); FDR corrected  $P < 0.001$ ) increased monotonically with bf  
72 duration, after controlling for covariates. Child's BMI *z*-scores ( $\beta$  (95% CI) = -0.040 (-0.063, -0.016);  
73 FDR corrected  $P = 0.001$ ), waist circumference ( $\beta$  (95% CI) = -0.037 (-0.060, -0.014), FDR corrected  
74  $P = 0.002$ ) and WHtR ( $\beta$  (95% CI) = -0.040 (-0.064, -0.018), FDR corrected  $P = 0.001$ ) decreased  
75 monotonically with increased bf duration, after controlling for covariates. Bf duration was inversely

76 associated with adiposity in children from high- and medium- ADI neighborhoods. Bf duration was  
77 positively associated with SA across ADI tertiles.

78 **Conclusions and Relevance:** Our results imply that long-term benefits of bf on body and brain  
79 development in offspring increase as bf duration increases, particularly in children from low SEEs.  
80 Policies and social support aimed to incremental increases in bf duration among women from low SEEs  
81 would confer long-term benefits for offspring.

82

83

84

85

86

87

88

89 **Introduction**

90

91 The short-term, multi-faceted benefits of breastfeeding (bf) for offspring brain and body development  
92 have been well-established. It is known that longer bf duration correlates with healthy weight gain and  
93 lower rates of infant obesity<sup>1</sup>. Additionally, multiple studies have shown that longer bf duration promotes  
94 better brain white matter (WM) development in infancy, which is associated with better childhood  
95 neurodevelopmental outcomes<sup>2,3</sup>. But there is limited knowledge on if these benefits persist into late  
96 childhood<sup>4</sup>.

97 Current knowledge of the benefits of bf on brain and body development in youth are limited using  
98 proxies such as obesity incidence and school performance. In addition to not being informative about  
99 underlying biological processes, these proxies are also strongly influenced by socioeconomic factors.  
100 Socioeconomic environment (SEE) is an important influencer of childhood development with higher SEE  
101 levels correlated with lower adiposity and greater brain structural measures<sup>5-7</sup>. Furthermore, studies tend  
102 to overstate long-term benefits of bf because of selection bias towards high SEE families who are more  
103 likely to breastfeed longer<sup>8-10</sup>. It remains unclear if long-term benefits of bf exist after controlling for SEE  
104 levels and if these benefits vary by SEEs.

105 In this study, we leveraged demographic, gestational and infant health history, anthropometric  
106 and brain data from the Adolescent Brain Cognitive Development (ABCD) study, the largest long-term  
107 study of pediatric brain development in the U.S., to determine relationships of bf duration with brain  
108 structure and adiposity markers in a cohort of 7511 9–10-year-olds from various SEE levels. Using these  
109 measures, as opposed to obesity incidence or test scores, we can better investigate the underlying  
110 biological changes associated with bf. We hypothesize that length of bf will have an inverse relationship  
111 with adiposity measures and positive relationship with structural brain measures independent of SEE  
112 levels. Based on prior work, we anticipate that the benefits of bf will be more pronounced in the higher  
113 SEE groups<sup>11,12</sup>.

114 **Methods**

115

116 *Participants*

117 Data was obtained from the baseline assessments of ABCD 3.0 data release (N=11,875). Details of  
118 ABCD study design, recruitment and inclusion/exclusion were mentioned elsewhere<sup>13</sup>. After applying  
119 study-specific exclusion criteria on anthropometric measurements, neuroimaging, and other covariates as  
120 described in the next sections, our final sample size is 7511.

121 *Breastfeeding length*

122 Breastfeeding duration was self-reported by the caregiver and was coded into 4 subcategories: no  
123 breastfeeding (0 months), 1-6 months, 7-12 months, >12 months. Categorizations were made with  
124 consideration to guidelines from the American Academy of Pediatrics, for synchronization with cut points  
125 used elsewhere in the literature, and to ensure adequate sample sizes within subgroupings<sup>14-17</sup>.

126 *Socioeconomic environment*

127 *Family level*

128 Parental education and annual family income were used as indexes of family level SEE. Parental  
129 education was coded as a binary variable indicating whether at least one parent has obtained a bachelor's  
130 degree. Yearly household income places combined income into three categories: less than \$50,000,  
131 between \$50,000 and \$99,999, and at least \$100,000.

132 *Neighborhood level*

133 Area Deprivation Index (ADI) was used to measure neighborhood-level SEE. ADI is a combination of  
134 characteristics of a neighborhood reported from the American Community Survey (2011-2015)<sup>18,19</sup>, with  
135 higher ADI score representing lower SEE. For this study, we computed ADI from primary addresses that  
136 were matched with 2010 US census tracts in order to identify neighborhoods of residence<sup>20</sup>. ADI

137 percentile score was computed for each participant corresponding to their primary residence, then was  
138 grouped into tertiles for ease of interpretation<sup>20</sup>.

### 139 *Adiposity markers*

140 Weight, height, and waist circumference were recorded by a trained researcher at baseline visit and used  
141 to calculate waist-to-height ratio (WHtR) and body mass index (BMI, kg/m<sup>2</sup>).

142 Measurements were further converted into age- and sex- specific BMI percentiles, BMI z-scores,  
143 weight z-scores, height z-scores and waist z-scores<sup>21,22</sup>. The following criteria were used to exclude  
144 anthropometrics data: 1) BMI z-scores  $\leq -4$  SDs or  $\geq 8$  SDs, 2) BMI  $< 10$ , 3) weight z-scores  $\leq -5$  SDs or  $\geq 8$   
145 SDs, 4) height z-scores or waist z-scores  $< -4$  SDs or  $> 4$  SDs, 5) WHtR  $\leq 0.2$  or  $\geq 1$ <sup>23,24</sup>.

### 146 *Neuroimaging*

147 T1-weighted anatomical scans were collected using methods optimized for 3-T scanners across multiple  
148 platforms at 21 ABCD Study sites<sup>25,26</sup>. T1 Images that passed ABCD quality control were segmented  
149 using FreeSurfer (version 5.3.0), yielding the following measures: total volumes of cortical gray,  
150 subcortical gray (GM) and white matter (WM) (mm<sup>3</sup>), cortical thickness (mm), and cortical surface area  
151 (SA) (mm<sup>2</sup>)<sup>27</sup>.

### 152 *Other relevant covariates*

153 The following variables were extracted from the ABCD database: race/ethnicity, pubertal stage,  
154 gestational age, maternal health problems during pregnancy, child health problems at birth, maternal age,  
155 and maternal alcohol or tobacco use during pregnancy. Further details can be found in supplementary  
156 methods<sup>28,29</sup>.

### 157 *Data Analysis*

158 All analyses were conducted in R. Individual linear mixed effects models were used to examine  
159 correlations between bf length (independent variable) and each global brain measurement and adiposity

160 marker (dependent variable) for the whole cohort, while controlling for family-level SEE and other  
161 relevant covariates. Age and sex were not included as covariates for models with BMI z-scores as a  
162 dependent variable. Models of brain measurements included handedness, and intracranial volume for  
163 volumetric measures. Family ID, nested within site, were modeled as random intercepts in models of  
164 adiposity markers; Family ID, nested within scanner ID, were modeled as random intercepts for models  
165 of brain measurements, to account for shared variation related to family membership and study visit  
166 location and/or scanner.

167 We investigated the interaction of ADI and bf duration only on those brain and adiposity  
168 measures identified as significant in the whole cohort model, followed by stratified analysis by each ADI  
169 tertile.

170 Linear mixed effects models used the *lme4* package<sup>30</sup>, with *P*-values calculated using  
171 Satterthwaite's method in the *lmerTest* package<sup>31</sup>. Standardized betas were reported. 95% Wald  
172 confidence intervals were calculated based on the local curvature of the likelihood surface. Tests of  
173 significance (2-tailed) were corrected for multiple comparisons using the Benjamini-Hochberg false  
174 discovery rate (FDR) correction, with  $P < 0.05$  as the corrected threshold for significance.

## 175 **Results**

176

### 177 *Participant Demographics*

178

179 **Table 1** describes characteristics of the sample by bf length category. 18.8% of child participants were  
180 breastfed for 0 months, 35.3% for 1-6 months, 24.9% for 7-12 months, and 21.0% for greater than 12  
181 months. Participants breastfed for different lengths (by category) differed in terms of age at baseline ( $F(3,$   
182  $7507) = 6.77, P = 0.0001$ ), race/ethnicity ( $X^2(12) = 586.52, P < 0.001$ ), family income ( $X^2(6) = 493.92,$   
183  $P < 0.001$ ), parental education ( $X^2(3) = 767.79, P < 0.001$ ), pubertal status ( $X^2(6) = 200.79, P < 0.001$ ),  
184 gestational age ( $F(3, 7507) = 67.00, P < 0.001$ ), maternal health problems ( $X^2(3) = 127.84, P < 0.001$ ),



185 health problems at birth ( $X^2(3) = 20.85, P=0.0001$ ), maternal age at birth ( $F(3, 7507) = 113.83, P<0.001$ ),  
186 and maternal alcohol and/or pregnancy use ( $X^2(3) = 28.50, P<0.001$ ).

### 187 *Breastfeeding Length and Child Global Brain Measurements*

188 BF duration was positively associated with total cortical SA ( $\beta$  (95% CI) = 0.053 (0.033, 0.074), FDR  
189 corrected  $P<0.0001$ , **Figure 1A**), cortical ( $\beta$  (95% CI) = 0.021 (0.010, 0.032), FDR corrected  $P=0.0002$ )  
190 and subcortical GM volume ( $\beta$  (95% CI) = 0.016 (0.003, 0.030), FDR corrected  $P=0.025$ ), and negatively  
191 associated with WM volume ( $\beta$  (95% CI) = -0.022 (-0.033, -0.011), FDR corrected  $P=0.0003$ ) (**Table 2**,  
192 Supplemental Figure 1A).

193 Similar results were observed from additional analyses where bf duration was dichotomized into  
194 any amount of bf vs. no bf (Supplementary Table 1).

### 195 *Breastfeeding Length and Child Adiposity Markers*

196 BF duration was negatively associated with adiposity markers (BMI z-scores:  $\beta$  (95% CI) = -0.040 (-  
197 0.063, -0.016), FDR corrected  $P=0.001$ , **Figure 1B**; Waist circumference:  $\beta$  (95% CI) = -0.037 (-0.060, -  
198 0.014), FDR corrected  $P=0.002$ ; WHtR:  $\beta$  (95% CI) = -0.040 (-0.064, -0.017), FDR corrected  $P=0.001$ )  
199 (**Table 2**, Supplemental Figure 1B).

200 Additional analyses examined relationships of adiposity markers with any amount of time bf vs.  
201 no bf (Supplementary Table 1) and found similar results.

### 202 *Breastfeeding-associated Effects on Brain and Adiposity Markers, modulated by ADI*

203 ADI by bf interactions were not significant for any global brain measurement. Stratified analysis revealed  
204 that total cortical SA was significantly correlated with bf length in each ADI tertile (low: ( $\beta$  (95% CI) =  
205 0.050 (0.013, 0.086), FDR corrected  $P=0.030$ ), medium: ( $\beta$  (95% CI) = 0.049 (0.012, 0.086), FDR  
206 corrected  $P=0.037$ ), high: ( $\beta$  (95% CI) = 0.054 (0.019, 0.089), FDR corrected  $P=0.006$ ) (**Table 3, Figure**  
207 **2A**). Total cortical GM volume was significantly correlated with bf length in the low-ADI group ( $\beta$  (95%

208 CI) = 0.023 (0.004, 0.043), FDR corrected  $P=0.042$ ) and high-ADI group ( $\beta$  (95% CI) = 0.030 (0.010,  
209 0.049), FDR corrected  $P=0.006$ ) (**Table 3**, Supplementary Figure 2A).

210 Interaction effects were not observed between ADI and bf on adiposity markers. Stratified  
211 analysis showed significant relationships between bf duration and BMI  $z$ -scores in the high-ADI group ( $\beta$   
212 (95% CI) = -0.049 (-0.085, -0.001), FDR corrected  $P=0.046$ ), and medium-ADI group ( $\beta$  (95% CI) = -  
213 0.042 (-0.083, -0.001), FDR corrected  $P=0.043$ ), but not low-ADI group ( $\beta$  (95% CI) = -0.027 (-0.068,  
214 0.014), FDR corrected  $P=0.505$ ) (**Table 3**, **Figure 2B**). Similar results were observed across ADI tertiles  
215 for waist circumference and WHtR (**Table 3**, Supplementary Figure 2B).

## 216 **Discussion**

217  
218 Our findings demonstrated monotonical relationships between bf duration and child global brain measures  
219 and adiposity markers even at 9-10 years for the entire study population, with longer bf duration being  
220 associated with greater brain measures and smaller adiposity markers. Furthermore, these relationships  
221 varied by SEE levels: longer bf duration was associated with lower adiposity in lower SEE children (i.e.,  
222 high- and medium- ADI). Longer bf duration was associated with greater cortical SA across 3 ADI levels.  
223 Our results indicate that long-term benefits of bf on brain and body development in offspring increase as  
224 bf length increases and provide scientific evidence for promoting bf, particularly women from low SEEs.

225 Across the entire study population, the benefits of bf persist into peri-adolescence. Longer bf  
226 duration is monotonically related to higher global brain measures, most robustly in cortical SA, cortical  
227 and subcortical GM volume. A binary categorization for bf (any amount of bf vs. no bf) yielded similar  
228 but less significant effects because data distribution within the bf categories was skewed towards the 1-6  
229 months duration. Our results indicate that beneficial effects of bf to the developing brain increase as bf  
230 length increases. Mothers' bf perceptions are critical to bf duration and reports have shown many  
231 mothers find the standard medical recommendations (e.g., exclusive bf for 6 months or longer)  
232 overwhelming<sup>32,33</sup>. Our findings indicate that advocacy and education aligned with incremental increase

233 in bf duration could improve bf rates in vulnerable women. With respect to brain benefits, our findings  
234 agree with other previous findings where longer bf duration was associated with better neurological and  
235 somatic outcomes with durations longer than 6 months having larger effects<sup>34-36</sup>. In line with our findings,  
236 positive association of brain GM development with length of bf has been reported across childhood<sup>4</sup>. In  
237 contrast to studies reporting improved WM development with longer bf duration, we found a negative  
238 correlation<sup>37</sup>. However, prior study results cannot be directly compared to our study as the modalities used  
239 to measure WM are not the same. Taken together with published findings across childhood, our findings  
240 suggest that bf fosters optimal brain development from infancy to peri-adolescence. These persistent  
241 neurodevelopmental benefits may underlie reports of higher IQ, cognitive, and language performances  
242 among breastfed children. The protective effects of bf on childhood obesity has been well-established<sup>38,39</sup>.  
243 In conjunction with other published studies across childhood, our findings show that longer bf duration is  
244 a protective factor for healthy body development well into peri-adolescence. Although specific bf  
245 durations were recommended by different organizations, our results indicate that any increment in bf  
246 duration provides increased benefits for healthy brain and body growth in children.

247 Our most prominent finding showed that the benefits of bf, for brain and body development  
248 among peri-adolescents, were not uniform across SEE levels. Contrary to prior studies<sup>6,12,40</sup>, we observed  
249 that children from lower SEEs (i.e., high- and medium- ADI neighborhoods) showed significantly lower  
250 adiposity with longer bf duration. This relationship was not significant in children from low-ADI  
251 neighborhood. In parallel, children across all SEE levels demonstrated positive associations between total  
252 cortical SA and bf duration. Mixed findings regarding the long-term benefits of bf could be attributed to  
253 how various studies accounted for confounders<sup>41-44</sup>. In particular, meta-analyses have shown that the  
254 direction and strength of association between bf duration and its long-term benefits changes based on how  
255 SEE is measured or modeled in the analysis<sup>45,46</sup>. For example, studies using absolute family income to  
256 measure SEE do not account for regional cost-of-living factors. The use of the nationally normed ADI  
257 measure allowed for accurate assessment of SEE in a large and diverse population. Additionally, bf

258 duration is strongly correlated with SEE<sup>47</sup> and therefore many prior studies were underpowered to  
259 disentangle the effects of SEE and bf duration on the child's brain and body development<sup>4</sup>. Leveraging a  
260 large and diverse cohort of children in the ABCD study, our study provides critical insight into SEE-  
261 independent and SEE-modulated associations between bf and brain and body development in children.  
262 Some studies have linked shorter bf duration among low SEE populations to the poor health outcomes to  
263 suggest that support longer bf duration in low SEE populations could improve child health outcomes<sup>48-50</sup>.  
264 Here, we provided direct evidence showing stronger negative relationships between bf duration and  
265 adiposity markers in children from lower SEE levels. Education and support aimed at increasing bf  
266 duration for children from lower SEE families, may partly offset their increased obesity risk<sup>51</sup>.

267 Our study has some limitations. This is an observational and cross-sectional study and therefore  
268 cannot establish causal mechanisms underlying these associations. Additionally, while significant, many  
269 of the effect sizes measured were small. But this was expected as development across childhood is  
270 influenced by multiple factors. We acknowledge that the reported bf durations may be subject to maternal  
271 recall bias 9-10 years after its occurrence. Confounders included in this analysis were limited to those  
272 available within the ABCD database.

## 273 **Conclusions**

274 This is the largest multi-site study investigating the relationships between bf duration and brain structure  
275 and adiposity markers in 9-10-year-old children. There were monotonic positive associations of bf  
276 duration with global brain measures, and negative associations with adiposity markers. Children from  
277 lower SEEs had stronger negative associations between bf duration and adiposity markers. These results  
278 suggest that the benefits of bf, on brain and body development, persist into peri-adolescence for the entire  
279 study population, and are larger for children from lower SEEs. Interventions and social policies designed  
280 to increase overall bf rates and duration has the potential to reduce child health disparities based on SEEs.

281

282 **Acknowledgements:** The authors would like to thank the volunteers who participated in the ABCD  
283 Study.

284 **Author Contributions:** Dr. Hsu performed the statistical analysis. Drs. Rajagopalan, Luo and Hsu  
285 drafted the manuscript. All authors provided critical review, commentary, and revisions to the manuscript,  
286 approved the final manuscript as submitted, and agree to be accountable for all aspects of the work.

287 **Competing Interest Statement:** The authors have nothing to disclose.

288 **Financial Support:** This work was supported by the National Institutes of Health (NIH) National  
289 Institute of Diabetes and Digestive and Kidney Diseases K01DK115638 (PI: SL), R03DK129186 (PI:  
290 SL) and USC Diabetes and Obesity Research Institute Pilot Award (PI: SL). V.R. is funded by  
291 NIH/NHLBI K01HL153942.

292 **Data Availability Statement:** Data for this manuscript were obtained from the ABCD study  
293 (<https://abcdstudy.org>), available from the National Institute of Mental Health Data Archive.

294 .

295

## 296 **References**

- 297 1. Monasta L, Batty GD, Cattaneo A, et al. Early-life determinants of overweight and obesity: a  
298 review of systematic reviews: Early-life determinants of obesity. *Obes Rev.* 2010;11(10):695-708.
- 299 2. Isaacs EB, Fischl BR, Quinn BT, Chong WK, Gadian DG, Lucas A. Impact of Breast Milk on  
300 Intelligence Quotient, Brain Size, and White Matter Development. *Pediatr Res.* 2010;67(4):357-362.
- 301 3. Deoni S, Dean D, Joelson S, O'Regan J, Schneider N. Early nutrition influences developmental  
302 myelination and cognition in infants and young children. *NeuroImage.* 2018;178:649-659.
- 303 4. Kafouri S, Kramer M, Leonard G, et al. Breastfeeding and brain structure in adolescence. *Int J*  
304 *Epidemiol.* 2013;42(1):150-159.
- 305 5. Ajami M, Abdollahi M, Salehi F, Oldewage-Theron W, Jamshidi-Naeini Y. The association  
306 between household socioeconomic status, breastfeeding, and infants' anthropometric indices. *Int J Prev*  
307 *Med.* 2018;9(1):89.
- 308 6. Smith MM. Influence of Breastfeeding on Cognitive Outcomes at Age 6-8 Years: Follow-up of  
309 Very Low Birth Weight Infants. *Am J Epidemiol.* 2003;158(11):1075-1082.
- 310 7. Schack-Nielsen L, Larnkjær A, Michaelsen KF. Long Term Effects of Breastfeeding on the Infant  
311 and Mother. In: Koletzko B, Dodds P, Akerblom H, Ashwell M, eds. *Early Nutrition and Its Later*  
312 *Consequences: New Opportunities.* Vol 569. Advances in Experimental Medicine and Biology. Springer-  
313 Verlag; 2005:16-23.
- 314 8. Colen CG, Ramey DM. Is breast truly best? Estimating the effects of breastfeeding on long-term  
315 child health and wellbeing in the United States using sibling comparisons. *Soc Sci Med.* 2014;109:55-65.
- 316 9. Evenhouse E, Reilly S. Improved Estimates of the Benefits of Breastfeeding Using Sibling  
317 Comparisons to Reduce Selection Bias. *Health Serv Res.* 2005;40(6p1):1781-1802.
- 318 10. Jiang M, Foster EM. Duration of Breastfeeding and Childhood Obesity: A Generalized  
319 Propensity Score Approach. *Health Serv Res.* 2013;48(2pt1):628-651.
- 320 11. Siqueira RS de, Monteiro CA. Breastfeeding and obesity in school-age children from families of  
321 high socioeconomic status. *Rev Saúde Pública.* 2007;41(1):5-12.
- 322 12. Horwood LJ, Fergusson DM. Breastfeeding and Later Cognitive and Academic Outcomes.  
323 *Pediatrics.* 1998;101(1):e9-e9.
- 324 13. Garavan H, Bartsch H, Conway K, et al. Recruiting the ABCD sample: Design considerations and  
325 procedures. *Dev Cogn Neurosci.* 2018;32:16-22.
- 326 14. SECTION ON BREASTFEEDING, Eidelman AI, Schanler RJ, et al. Breastfeeding and the Use  
327 of Human Milk. *Pediatrics.* 2012;129(3):e827-e841.
- 328 15. Walfisch A, Sermer C, Cressman A, Koren G. Breast milk and cognitive development—the role  
329 of confounders: a systematic review. *BMJ Open.* 2013;3(8):e003259.
- 330 16. Schanler RJ, American Academy of Pediatrics, American College of Obstetricians and  
331 Gynecologists, eds. *Breastfeeding Handbook for Physicians.* 2nd edition. American Academy of  
332 Pediatrics ; American College of Obstetricians and Gynecologists; 2014.

- 333 17. Lopez DA, Foxe JJ, Mao Y, Thompson WK, Martin HJ, Freedman EG. Breastfeeding Duration Is  
334 Associated With Domain-Specific Improvements in Cognitive Performance in 9–10-Year-Old Children.  
335 *Front Public Health*. 2021;9:657422.
- 336 18. Singh GK. Area Deprivation and Widening Inequalities in US Mortality, 1969-1998. *Am J Public*  
337 *Health*. 2003;93(7):1137-1143.
- 338 19. Kind AJ, Jencks S, Brock J, et al. Neighborhood Socioeconomic Disadvantage and 30-Day  
339 Rehospitalization: A retrospective cohort study. *Ann Intern Med*. 2014;161:765-774.
- 340 20. Fan CC, Marshall A, Smolker H, et al. Adolescent Brain Cognitive Development (ABCD) study  
341 Linked External Data (LED): Protocol and practices for geocoding and assignment of environmental data.  
342 *Dev Cogn Neurosci*. 2021;52.
- 343 21. Kuczmariski RJ, Ogden CL, Grummer-Strawn LM, et al. CDC growth charts for the United  
344 States: Methods and Development. *Vital Health Stat*. 2002;11(246).
- 345 22. Flegal KM, Cole TJ. *Construction of LMS Parameters for the Centers for Disease Control and*  
346 *Prevention 2000 Growth Charts*. National Center for Health Statistics; 2013.
- 347 23. Freedman DS, Berenson GS. Tracking of BMI z Scores for Severe Obesity. *Pediatrics*.  
348 2017;140(3).
- 349 24. Sharma AK, Metzger DL, Daymont C, Hadjiyannakis S, Rodd CJ. LMS tables for waist-  
350 circumference and waist-height ratio Z-scores in children aged 5–19 y in NHANES III: association with  
351 cardio-metabolic risks. *Pediatr Res*. 2015;78:723-729.
- 352 25. Casey BJ, Cannonier T, Conley MI, et al. The Adolescent Brain Cognitive Development (ABCD)  
353 study: Imaging acquisition across 21 sites. *Dev Cogn Neurosci*. 2018;32:43-54.
- 354 26. Hagler DJ, Hatton SN, Cornejo MD, et al. Image processing and analysis methods for the  
355 Adolescent Brain Cognitive Development Study. *NeuroImage*. 2019;202.
- 356 27. Fischl B, Salat DH, Busa E, et al. Whole Brain Segmentation. *Neuron*. 2002;33(3):341-355.
- 357 28. Barch DM, Albaugh MD, Avenevoli S, et al. Demographic, physical and mental health  
358 assessments in the adolescent brain and cognitive development study: Rationale and description. *Dev*  
359 *Cogn Neurosci*. 2018;32:55-66.
- 360 29. Barch DM, Albaugh MD, Baskin-Sommers A, et al. Demographic and mental health assessments  
361 in the adolescent brain and cognitive development study: Updates and age-related trajectories. *Dev Cogn*  
362 *Neurosci*. 2021;52:101031.
- 363 30. Bates D, Mächler M, Bolker B, Walker S. Fitting Linear Mixed-Effects Models Using lme4. *J*  
364 *Stat Softw*. 2015;67(1).
- 365 31. Kuznetsova A, Brockhoff PB, Christensen RH. lmerTest Package: Tests in Linear Mixed Effects  
366 Models. *J Stat Softw*. 2017;82(13):1-26.
- 367 32. Henshaw EJ, Fried R, Siskind E, Newhouse L, Cooper M. Breastfeeding Self-Efficacy, Mood,  
368 and Breastfeeding Outcomes among Primiparous Women. *J Hum Lact*. 2015;31(3):511-518.
- 369 33. Kronborg H, Harder I, Hall EOC. First time mothers' experiences of breastfeeding their newborn.  
370 *Sex Reprod Healthc*. 2015;6(2):82-87.

- 371 34. Dee DL, Li R, Lee LC, Grummer-Strawn LM. Associations Between Breastfeeding Practices and  
372 Young Children's Language and Motor Skill Development. *Pediatrics*. 2007;119(Supplement\_1):S92-  
373 S98.
- 374 35. Oddy WH, Li J, Whitehouse AJO, Zubrick SR, Malacova E. Breastfeeding Duration and  
375 Academic Achievement at 10 Years. *Pediatrics*. 2011;127(1):e137-e145.
- 376 36. Lanting CI, Huisman M, Boersma ER, Touwen BCL, Fidler V. Neurological differences between  
377 9-year-old children fed breast-milk or formula-milk as babies. *The Lancet*. 1994;344(8933):1319-1322.
- 378 37. Deoni SCL, Dean DC, Piryatinsky I, et al. Breastfeeding and early white matter development: A  
379 cross-sectional study. *NeuroImage*. 2013;82:77-86.
- 380 38. Carling SJ, Demment MM, Kjolhede CL, Olson CM. Breastfeeding Duration and Weight Gain  
381 Trajectory in Infancy. *Pediatrics*. 2015;135(1):111-119.
- 382 39. Contarato AAPF, Rocha ED de M, Czarnobay SA, Mastroeni SS de BS, Veugelers PJ, Mastroeni  
383 MF. Efeito independente do tipo de aleitamento no risco de excesso de peso e obesidade em crianças  
384 entre 12-24 meses de idade. *Cad Saúde Pública*. 2016;32(12).
- 385 40. Jacobson SW, Chiodo LM, Jacobson JL. Breastfeeding Effects on Intelligence Quotient in 4- and  
386 11-Year-Old Children. *Pediatrics*. 1999;103(5):e71-e71.
- 387 41. Pruszkowska-Przybylska P, Sitek A, Rosset I, et al. The association between socioeconomic  
388 status, duration of breastfeeding, parental age and birth parameters with BMI, body fat and muscle mass  
389 among prepubertal children in Poland. *Anthropol Anz*. 2019;76(5):409-419.
- 390 42. von Stumm S, Plomin R. Breastfeeding and IQ Growth from Toddlerhood through Adolescence.  
391 Pietschnig J, ed. *PLOS ONE*. 2015;10(9):e0138676.
- 392 43. Zhou SJ, Baghurst P, Gibson RA, Makrides M. Home environment, not duration of breast-  
393 feeding, predicts intelligence quotient of children at four years. *Nutrition*. 2007;23(3):236-241.
- 394 44. Zhao X, Yang J. Longer breastfeeding duration, better child development? Evidence from a large-  
395 scale survey in China. *Child Youth Serv Rev*. 2022;133:106336.
- 396 45. Marseglia L, Manti S, D'Angelo G, et al. Obesity and breastfeeding: The strength of association.  
397 *Women Birth*. 2015;28(2):81-86.
- 398 46. Anderson JW, Johnstone BM, Remley DT. Breast-feeding and cognitive development: a meta-  
399 analysis. *Am J Clin Nutr*. 1999;70(4):525-535.
- 400 47. Flacking R, Wallin L, Ewald U. Perinatal and socioeconomic determinants of breastfeeding  
401 duration in very preterm infants. *Acta Paediatr*. 2007;96(8):1126-1130.
- 402 48. Gebremariam MK, Lien N, Nianogo RA, Arah OA. Mediators of socioeconomic differences in  
403 adiposity among youth: a systematic review: Socioeconomic position, adiposity and mediators. *Obes Rev*.  
404 2017;18(8):880-898.
- 405 49. Woo JG, Dolan LM, Morrow AL, Geraghty SR, Goodman E. Breastfeeding Helps Explain Racial  
406 and Socioeconomic Status Disparities in Adolescent Adiposity. *Pediatrics*. 2008;121(3):e458-e465.



- 407 50. Natale BN, Shaw DS, Janson H, Nærde A. Duration of Breastfeeding Mediates the Association  
408 Between Early Socioeconomic Risk and Child Vocabulary at Age 4. *J Dev Behav Pediatr*.  
409 2021;42(6):472-480.
- 410 51. Horta BL, Loret de Mola C, Victora CG. Long-term consequences of breastfeeding on  
411 cholesterol, obesity, systolic blood pressure and type 2 diabetes: a systematic review and meta-analysis.  
412 *Acta Paediatr*. 2015;104:30-37.
- 413

414

415 **Table 1. Sample Characteristics by Breastfeeding Length Category**

416

|                                                 | No<br>Breastfeeding<br>(N=1412) | 1-6 months<br>(N=2651)   | 7-12<br>months<br>(N=1873) | > 12<br>months<br>(N=1575) | Total(N=7511)         |                              |
|-------------------------------------------------|---------------------------------|--------------------------|----------------------------|----------------------------|-----------------------|------------------------------|
|                                                 | Mean (SD) or N<br>(%)           | Mean<br>(SD) or N<br>(%) | Mean<br>(SD) or N<br>(%)   | Mean<br>(SD) or N<br>(%)   | Mean (SD) or<br>N (%) | <i>P</i> -value <sup>a</sup> |
| Age (years)                                     | 9.928 (0.607)                   | 9.952<br>(0.628)         | 9.882<br>(0.631)           | 9.878<br>(0.632)           | 9.915<br>(0.626)      | <b>0.0001***</b>             |
| Sex                                             |                                 |                          |                            |                            |                       |                              |
| Female                                          | 667 (47.2%)                     | 1307<br>(49.3%)          | 897<br>(47.9%)             | 759<br>(48.2%)             | 3630<br>(48.3%)       | 0.608                        |
| Male                                            | 745 (52.8%)                     | 1344<br>(50.7%)          | 976<br>(52.1%)             | 816<br>(51.8%)             | 3881<br>(51.7%)       |                              |
| Race/Ethnicity                                  |                                 |                          |                            |                            |                       |                              |
| White                                           | 606 (42.9%)                     | 1425<br>(53.8%)          | 1212<br>(64.7%)            | 1065<br>(67.6%)            | 4308<br>(57.4%)       | <b>&lt;0.001***</b>          |
| Black                                           | 389 (27.5%)                     | 318<br>(12.0%)           | 114<br>(6.1%)              | 56 (3.6%)                  | 877 (11.7%)           |                              |
| Hispanic                                        | 263 (18.6%)                     | 586<br>(22.1%)           | 323<br>(17.2%)             | 265<br>(16.8%)             | 1437<br>(19.1%)       |                              |
| Asian                                           | 8 (0.6%)                        | 44 (1.7%)                | 38 (2.0%)                  | 39 (2.5%)                  | 129 (1.7%)            |                              |
| Other                                           | 146 (10.3%)                     | 278<br>(10.5%)           | 186<br>(9.9%)              | 150<br>(9.5%)              | 760 (10.1%)           |                              |
| Family Income                                   |                                 |                          |                            |                            |                       |                              |
| <\$50,000                                       | 661 (46.8%)                     | 751<br>(28.3%)           | 359<br>(19.2%)             | 278<br>(17.7%)             | 2049<br>(27.3%)       | <b>&lt;0.001***</b>          |
| ≥\$50,000 and<br><\$100,000                     | 419 (29.7%)                     | 754<br>(28.4%)           | 519<br>(27.7%)             | 478<br>(30.3%)             | 2170<br>(28.9%)       |                              |
| ≥\$100,000                                      | 332 (23.5%)                     | 1146<br>(43.2%)          | 995<br>(53.1%)             | 819<br>(52.0%)             | 3292<br>(43.8%)       |                              |
| Parental Education                              |                                 |                          |                            |                            |                       |                              |
| No Bachelor's<br>Degree                         | 900 (63.7%)                     | 1042<br>(39.3%)          | 445<br>(23.8%)             | 324<br>(20.6%)             | 2711<br>(36.1%)       | <b>&lt;0.001***</b>          |
| Bachelor's<br>Degree or Higher                  | 512 (26.3%)                     | 1609<br>(60.7%)          | 1428<br>(76.2%)            | 1251<br>(79.4%)            | 4800<br>(63.9%)       |                              |
| Pubertal Stage                                  |                                 |                          |                            |                            |                       |                              |
| Pre-Puberty                                     | 609 (43.1%)                     | 1281<br>(48.3%)          | 1112<br>(59.4%)            | 942<br>(59.8%)             | 3944<br>(52.5%)       | <b>&lt;0.001***</b>          |
| Early Puberty                                   | 312 (22.1%)                     | 659<br>(24.9%)           | 428<br>(22.9%)             | 352<br>(22.3%)             | 1751<br>(23.3%)       |                              |
| Mid-Post Puberty                                | 491 (34.8%)                     | 711<br>(26.8%)           | 333<br>(17.8%)             | 281<br>(17.8%)             | 1816<br>(24.2%)       |                              |
| Gestational Age at<br>Birth                     | 38.832<br>(2.426)               | 38.788<br>(2.466)        | 38.391<br>(1.725)          | 39.586<br>(1.423)          | 39.114<br>(2.130)     | <b>&lt;0.001***</b>          |
| Maternal Health<br>Problems During<br>Pregnancy |                                 |                          |                            |                            |                       |                              |
| No                                              | 760 (53.8%)                     | 1547<br>(58.4%)          | 1277<br>(68.2%)            | 1102<br>(70.0%)            | 4686<br>(62.4%)       | <b>&lt;0.001***</b>          |

|                                                        |                   |                   |                   |                   |                   |                     |
|--------------------------------------------------------|-------------------|-------------------|-------------------|-------------------|-------------------|---------------------|
| Yes                                                    | 652 (46.2%)       | 1104<br>(41.6%)   | 596<br>(31.8%)    | 473<br>(30.0%)    | 2825<br>(37.6%)   |                     |
| Child Health<br>Problems at Birth                      |                   |                   |                   |                   |                   |                     |
| No                                                     | 1046 (74.1%)      | 1843<br>(69.5%)   | 1375<br>(73.4%)   | 1187<br>(75.4%)   | 5451<br>(72.6%)   | <b>0.0001***</b>    |
| Yes                                                    | 366 (25.9%)       | 808<br>(30.5%)    | 498<br>(26.6%)    | 388<br>(24.6%)    | 2060<br>(27.4%)   |                     |
| Mother's Age at<br>Birth                               | 27.381<br>(6.514) | 29.547<br>(6.219) | 30.482<br>(5.481) | 31.140<br>(5.445) | 29.707<br>(6.077) | <b>&lt;0.001***</b> |
| Maternal Alcohol<br>or Tobacco use<br>During Pregnancy |                   |                   |                   |                   |                   |                     |
| No                                                     | 898 (63.6%)       | 1695<br>(63.9%)   | 1322<br>(70.6%)   | 1070<br>(67.9%)   | 4985<br>(66.4%)   | <b>&lt;0.001***</b> |
| Yes                                                    | 514 (36.4%)       | 956<br>(36.1%)    | 551<br>(29.4%)    | 505<br>(32.1%)    | 2526<br>(33.6%)   |                     |

417 <sup>a</sup> \*\*\*  $P < 0.001$

418

419 **Table 2. Associations between Breastfeeding Length Category (Monotonic Relationship)**  
420 **and Child Adiposity Markers, Global Brain Measurements**  
421

| Measurement                      | Std $\beta$ (95% CI)    | <i>P</i> -value | FDR-adjusted <i>P</i> -value <sup>a</sup> |
|----------------------------------|-------------------------|-----------------|-------------------------------------------|
| <b>Global Brain Measurements</b> |                         |                 |                                           |
| Total Cortical Surface area      | 0.053 (0.033, 0.074)    | <0.0001         | <b>&lt;0.0001***</b>                      |
| Mean Cortical Thickness          | 0.007 (-0.015, 0.028)   | 0.53            | 0.53                                      |
| Cortical Gray Matter Volume      | 0.021 (0.010, 0.032)    | 0.0002          | <b>0.0004***</b>                          |
| Subcortical Gray Matter Volume   | 0.016 (0.003, 0.030)    | 0.02            | <b>0.025*</b>                             |
| Cerebral White matter Volume     | -0.022 (-0.033, -0.011) | 0.0001          | <b>0.0003***</b>                          |
| <b>Adiposity Markers</b>         |                         |                 |                                           |
| BMI <i>z</i> -scores             | -0.040 (-0.063, -0.016) | 0.001           | <b>0.001**</b>                            |
| Waist Circumference              | -0.037 (-0.060, -0.014) | 0.002           | <b>0.002**</b>                            |
| Waist-to-Height Ratio            | -0.041 (-0.064, -0.017) | 0.001           | <b>0.001**</b>                            |

422 <sup>a</sup> \*  $P < 0.05$ , \*\*  $P < 0.01$ , \*\*\*  $P < 0.001$

423 **Table 3. Associations between Breastfeeding Length Category and Child Adiposity**  
 424 **Markers, Global Brain Measurements, Stratified by Area Development Index (ADI)**  
 425 **tertiles**  
 426

| Measurement                      | High ADI                |                                                  | Medium ADI              |                                     | Low ADI                |                                     |
|----------------------------------|-------------------------|--------------------------------------------------|-------------------------|-------------------------------------|------------------------|-------------------------------------|
|                                  | Std $\beta$<br>(95% CI) | FDR-<br>adjusted<br><i>P</i> -value <sup>a</sup> | Std $\beta$<br>(95% CI) | FDR-<br>adjusted<br><i>P</i> -value | Std $\beta$ (95% CI)   | FDR-<br>adjusted<br><i>P</i> -value |
| <b>Global Brain measurements</b> |                         |                                                  |                         |                                     |                        |                                     |
| Total Cortical Surface area      | 0.054 (0.019, 0.089)    | <b>0.006**</b>                                   | 0.049 (0.012, 0.086)    | <b>0.037*</b>                       | 0.050 (0.013, 0.086)   | <b>0.030*</b>                       |
| Cortical Gray Matter Volume      | 0.030 (0.010, 0.049)    | <b>0.006**</b>                                   | 0.015 (-0.005, 0.034)   | 0.199                               | 0.023 (0.004, 0.043)   | <b>0.042*</b>                       |
| Subcortical Gray Matter Volume   | 0.019 (-0.005, 0.043)   | 0.152                                            | 0.024 (-0.0002, 0.049)  | 0.105                               | 0.009 (-0.015, 0.033)  | 0.601                               |
| Cerebral White Matter Volume     | 0.011 (-0.026, 0.049)   | 0.554                                            | 0.021 (-0.016, 0.058)   | 0.274                               | 0.010 (-0.027, 0.047)  | 0.601                               |
| <b>Adiposity Markers</b>         |                         |                                                  |                         |                                     |                        |                                     |
| BMI <i>z</i> -scores             | -0.049 (-0.085, -0.001) | <b>0.046*</b>                                    | -0.042 (-0.083, -0.001) | <b>0.043*</b>                       | -0.027 (-0.068, 0.014) | 0.505                               |
| Waist Circumference              | -0.042 (-0.084, -0.001) | <b>0.046*</b>                                    | -0.050 (-0.089, -0.011) | <b>0.019*</b>                       | -0.013 (-0.053, 0.026) | 0.505                               |
| Waist-to-Height Ratio            | -0.043 (-0.085, -0.001) | <b>0.046*</b>                                    | -0.053 (-0.093, -0.138) | <b>0.019*</b>                       | -0.017 (-0.058, 0.023) | 0.505                               |

427 <sup>a</sup> \*  $P < 0.05$ , \*\*  $P < 0.01$

428

## 429 **Figure legends**

430 Figure 1. Relationships between breastfeeding length and child brain and adiposity markers. A). Boxplots display  
431 distributions of total cortical surface area (adjusted for family ID nested within scanner id, handedness, age, sex,  
432 pubertal status, race/ethnicity, family income, parental education, gestational age, maternal health problems during  
433 pregnancy, child health problems at birth, maternal age at birth, and maternal alcohol or tobacco use during  
434 pregnancy) separated by breastfeeding length category. B). Boxplots display distributions of BMI z-scores (adjusted  
435 for family ID nested within site, pubertal status, race/ethnicity, family income, parental education, gestational age,  
436 maternal health problems during pregnancy, child health problems at birth, mother's age at birth, and maternal  
437 alcohol or tobacco use during pregnancy) separated by breastfeeding length category.

438 Figure 2. Relationships between breastfeeding length and child brain and adiposity markers in children from  
439 neighborhoods with low, medium, and high area deprivation index (ADI). A) Plots display relationship of total  
440 cortical surface area with breastfeeding length category, and ADI (in tertiles), with adjustment for family ID nested  
441 within site, scanner model, age, sex, pubertal status, race/ethnicity, family income, parental education, handedness,  
442 intracranial volume, gestational age, maternal health problems during pregnancy, child health problems at birth,  
443 maternal age at birth, and maternal alcohol or tobacco use during pregnancy. All adjustments are made within  
444 individual ADI tertiles. B) Plots display relationship of BMI z-scores with breastfeeding length category, and ADI  
445 (in tertiles), with adjustment for family ID nested within site, pubertal status, race/ethnicity, family income, parental  
446 education, gestational age, maternal health problems during pregnancy, child health problems at birth, maternal age  
447 at birth, and maternal alcohol or tobacco use during pregnancy. All adjustments are made within individual ADI  
448 tertiles.

449 \*  $P < 0.05$

450

**A**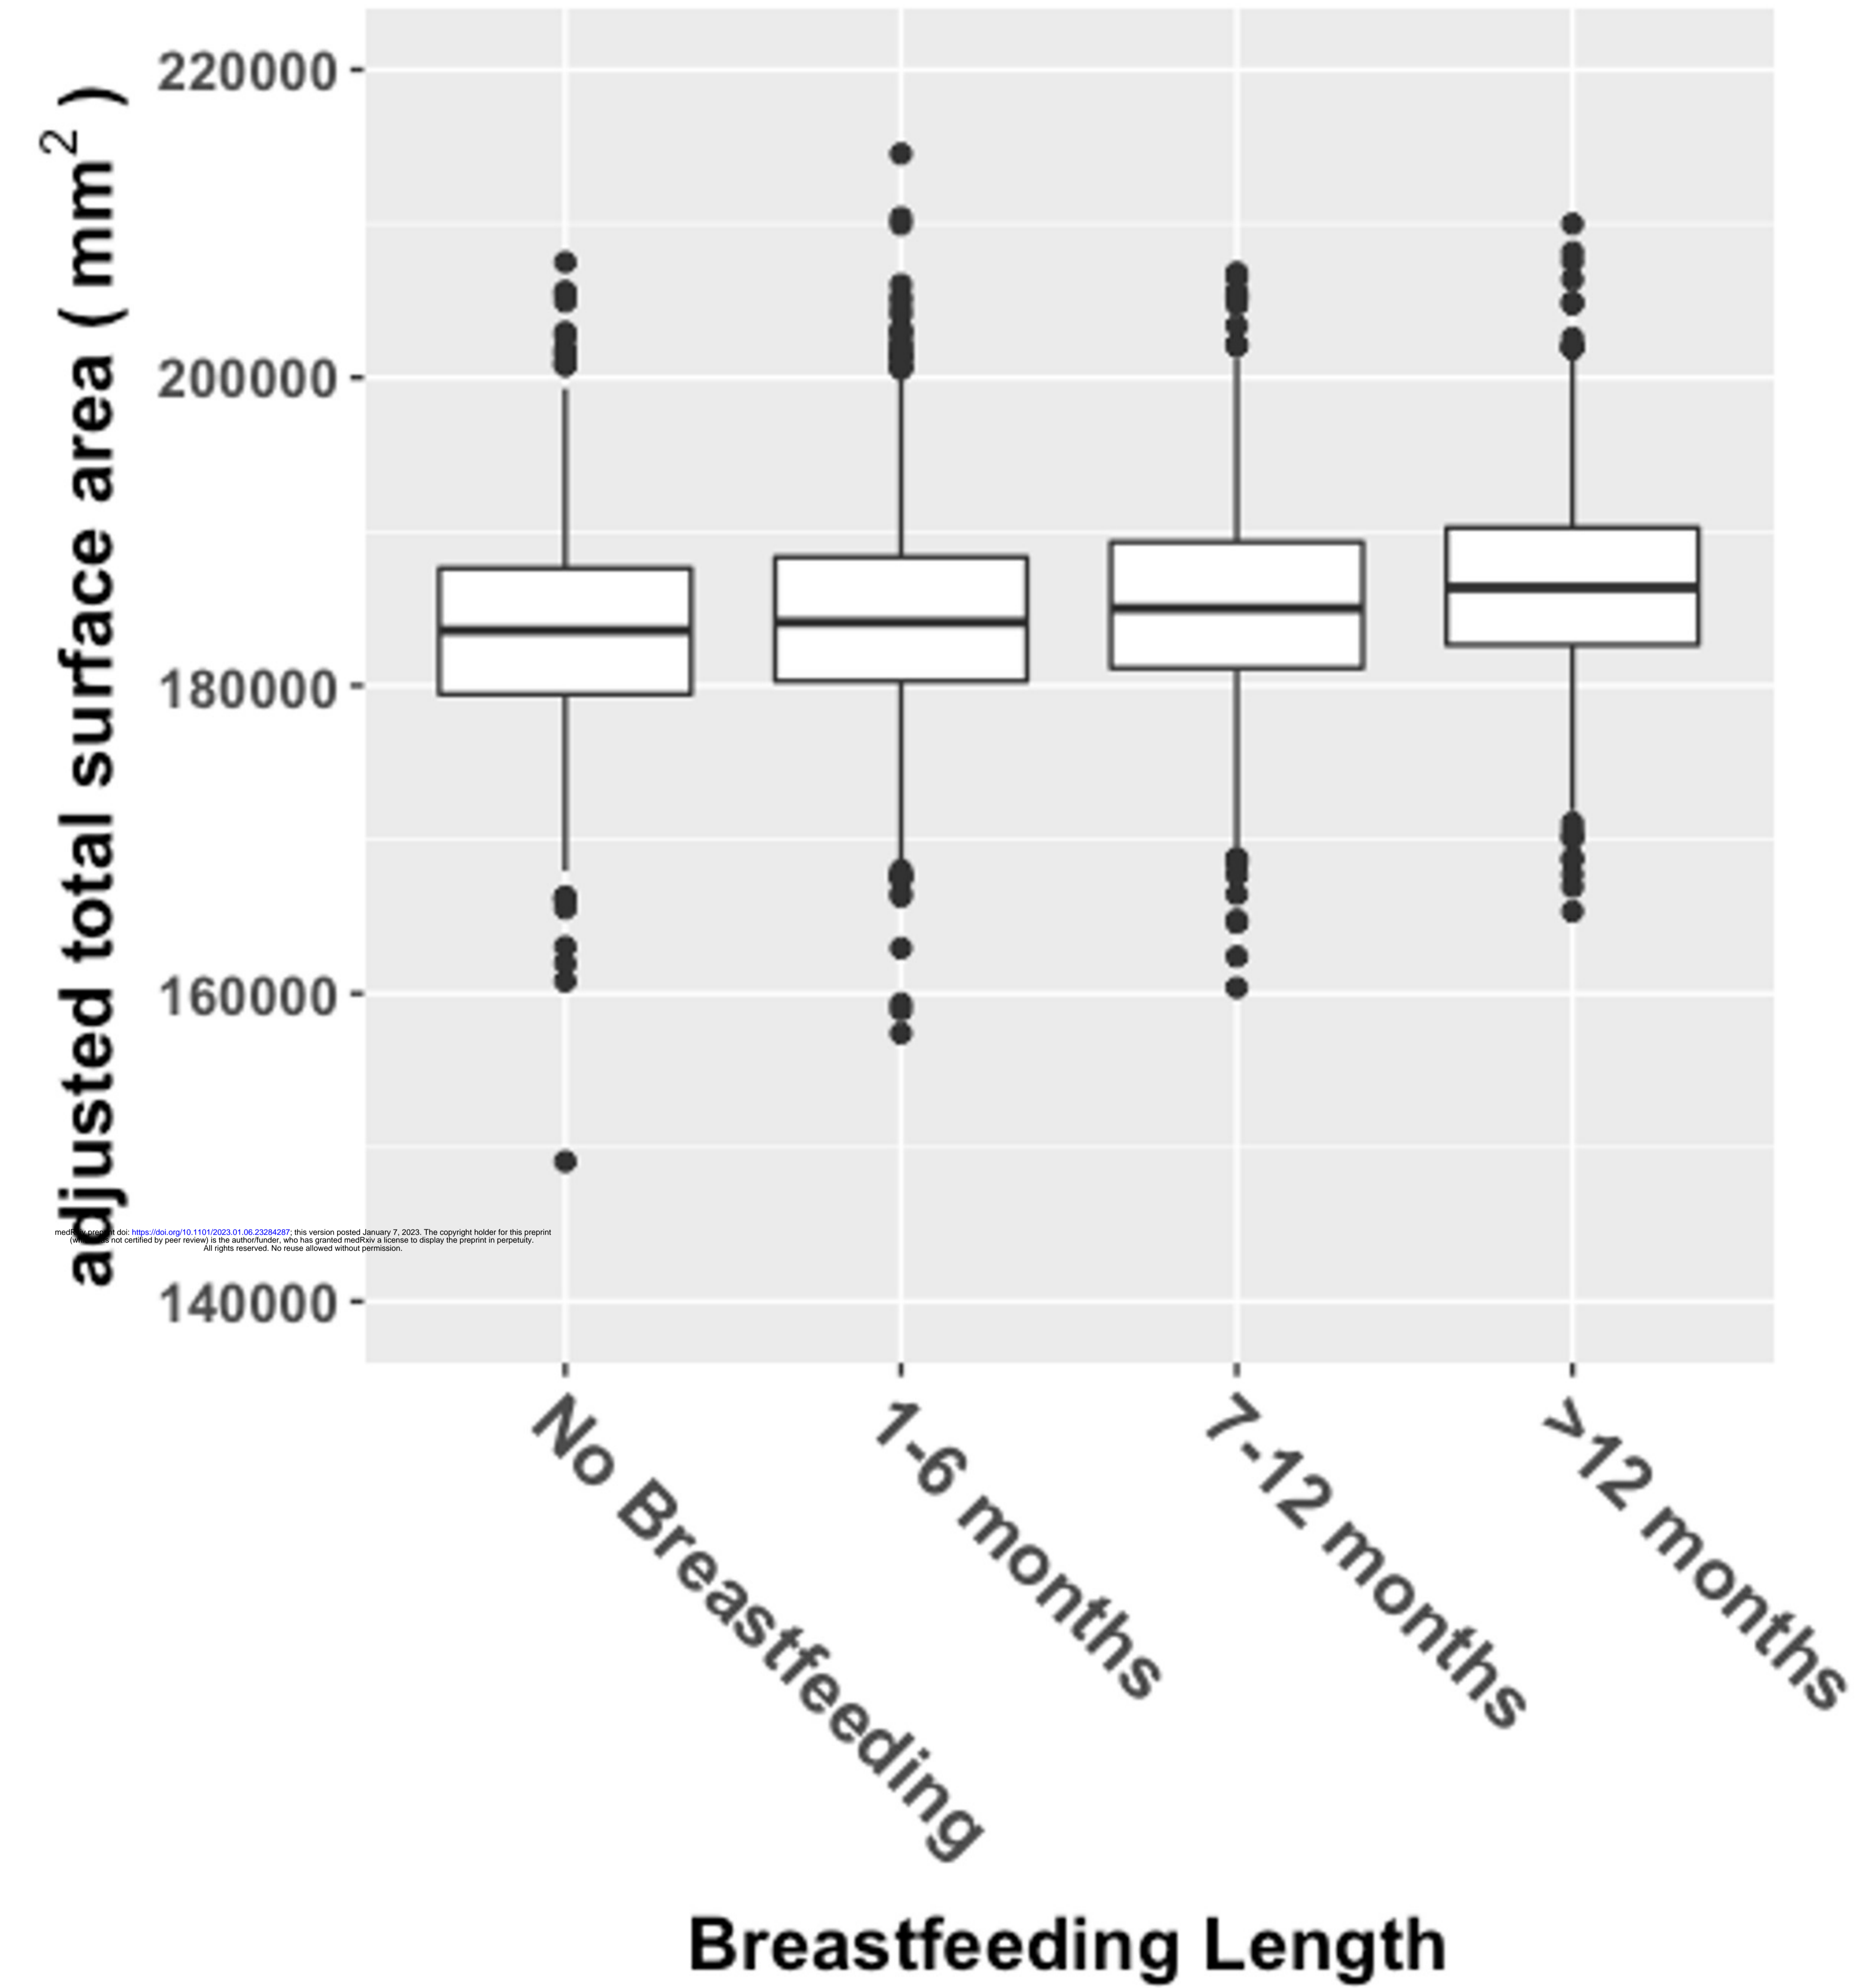**B**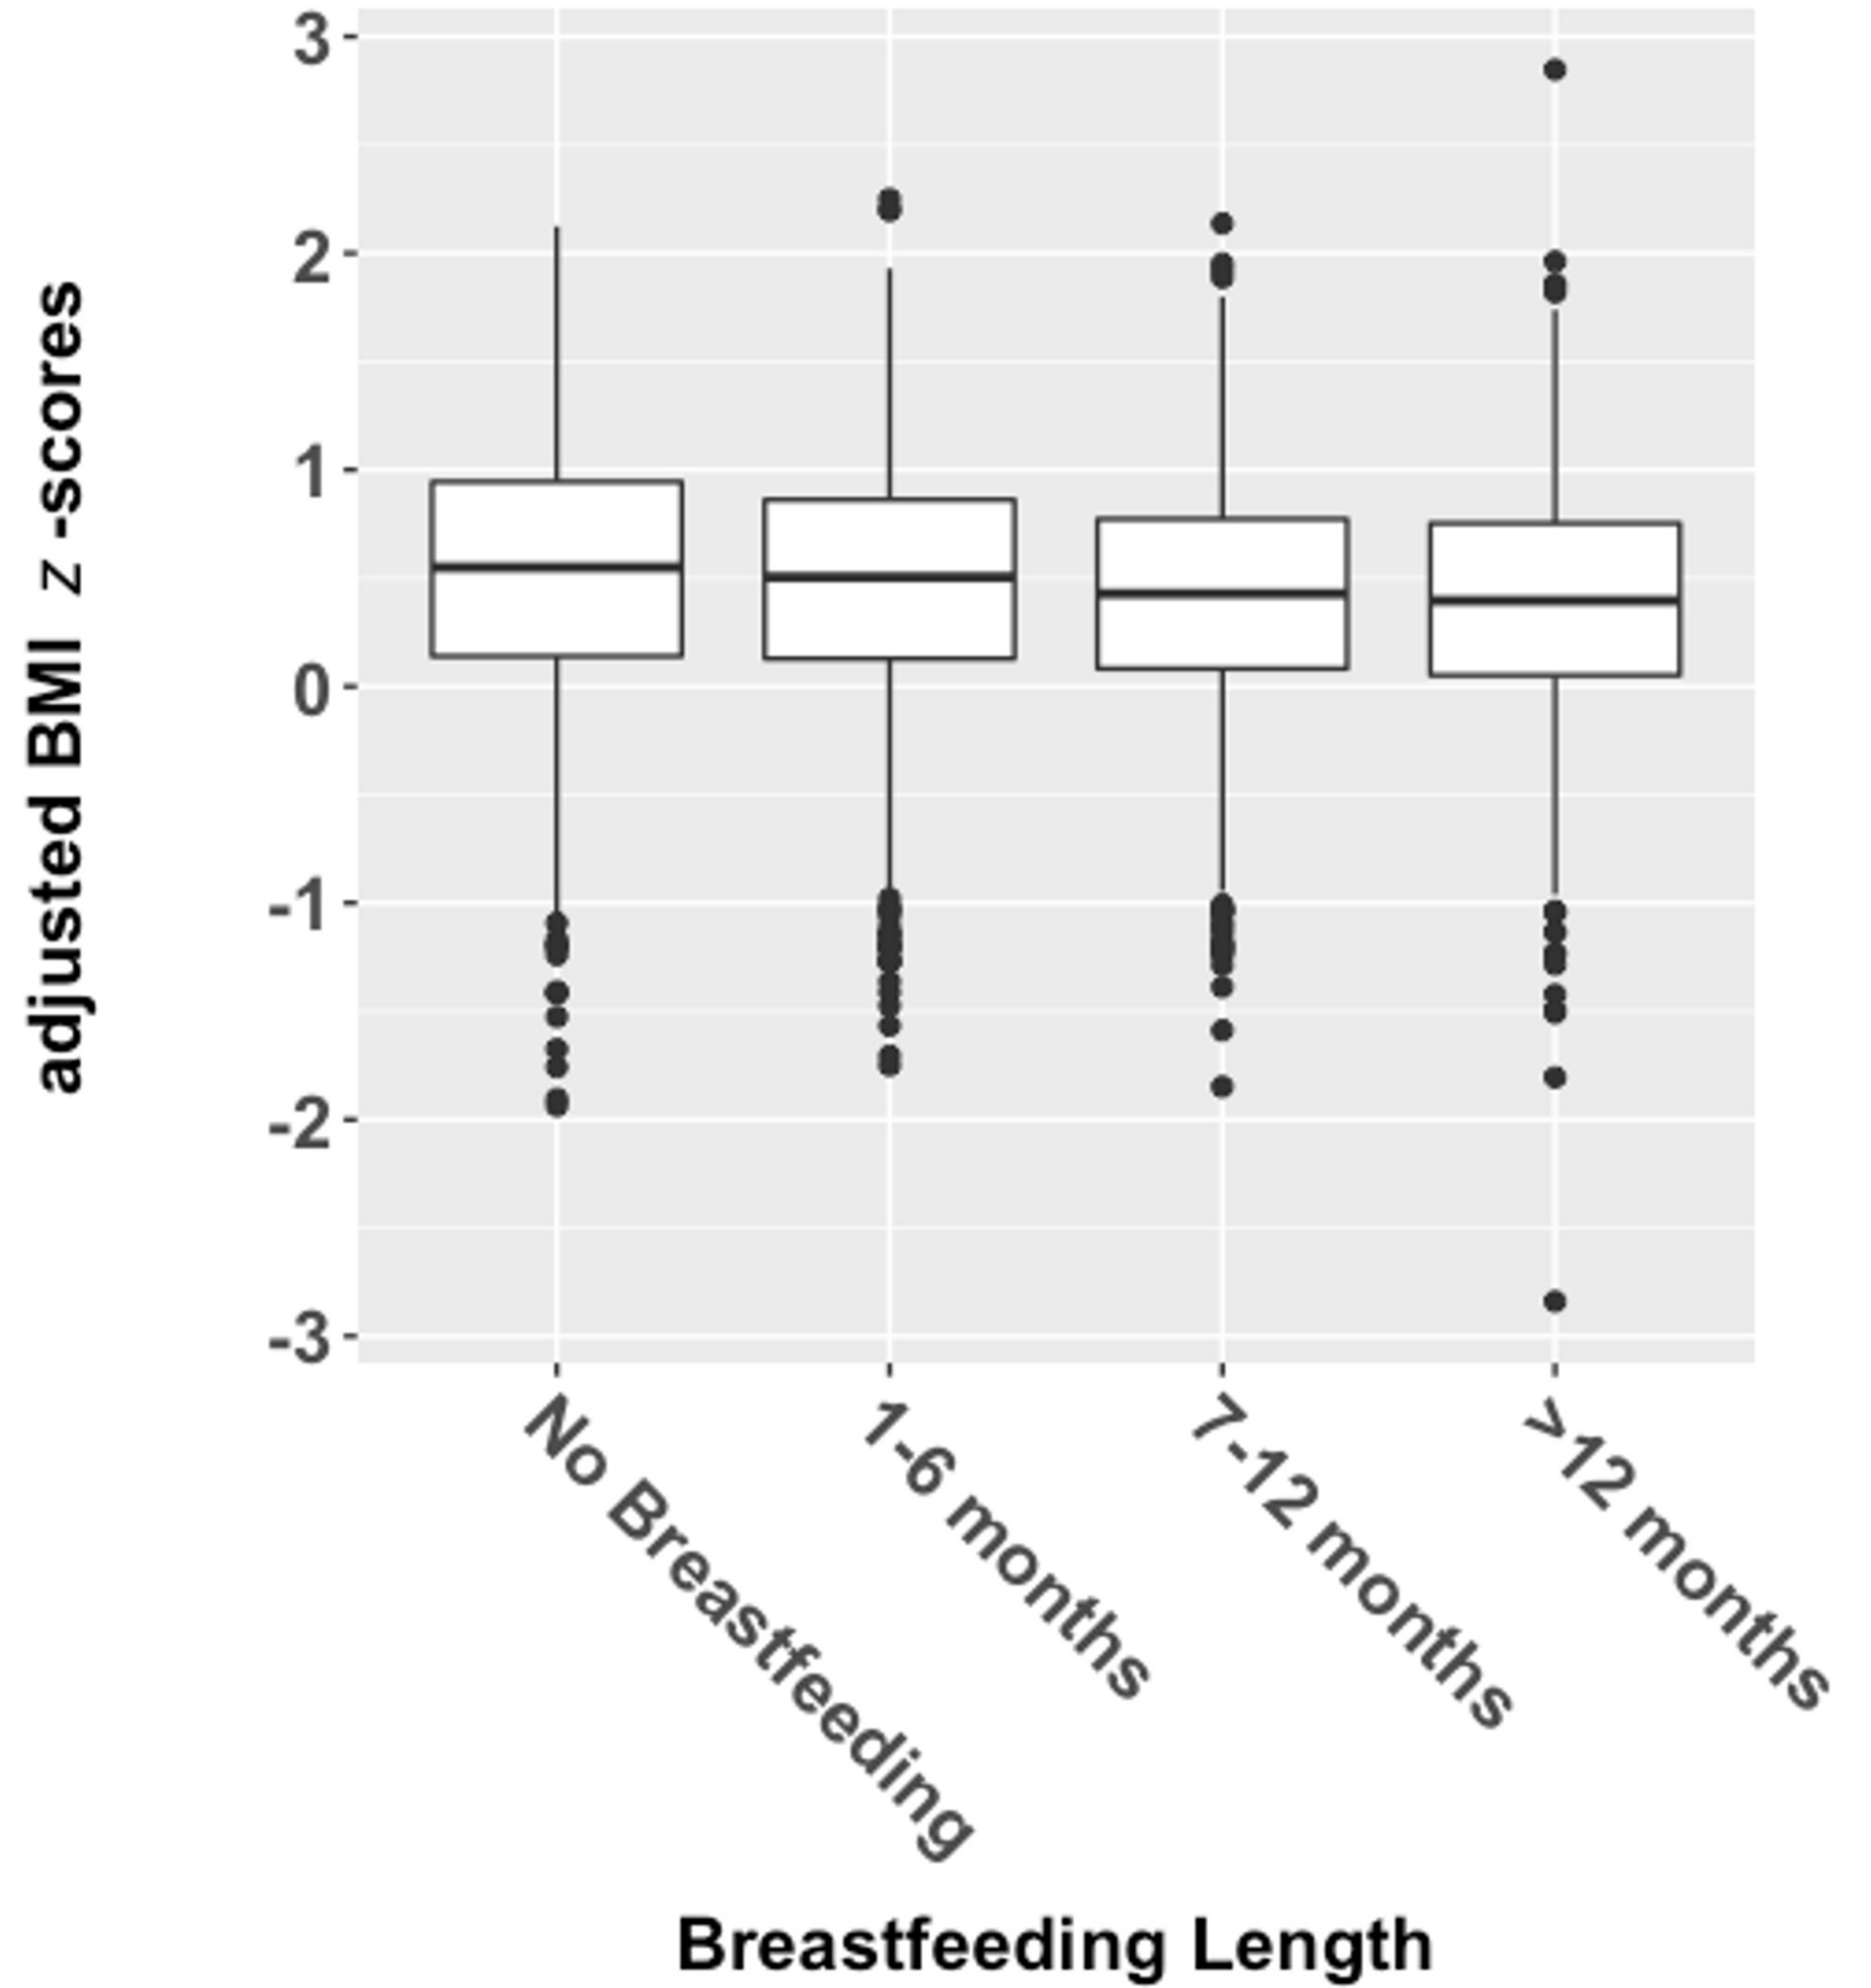

**A**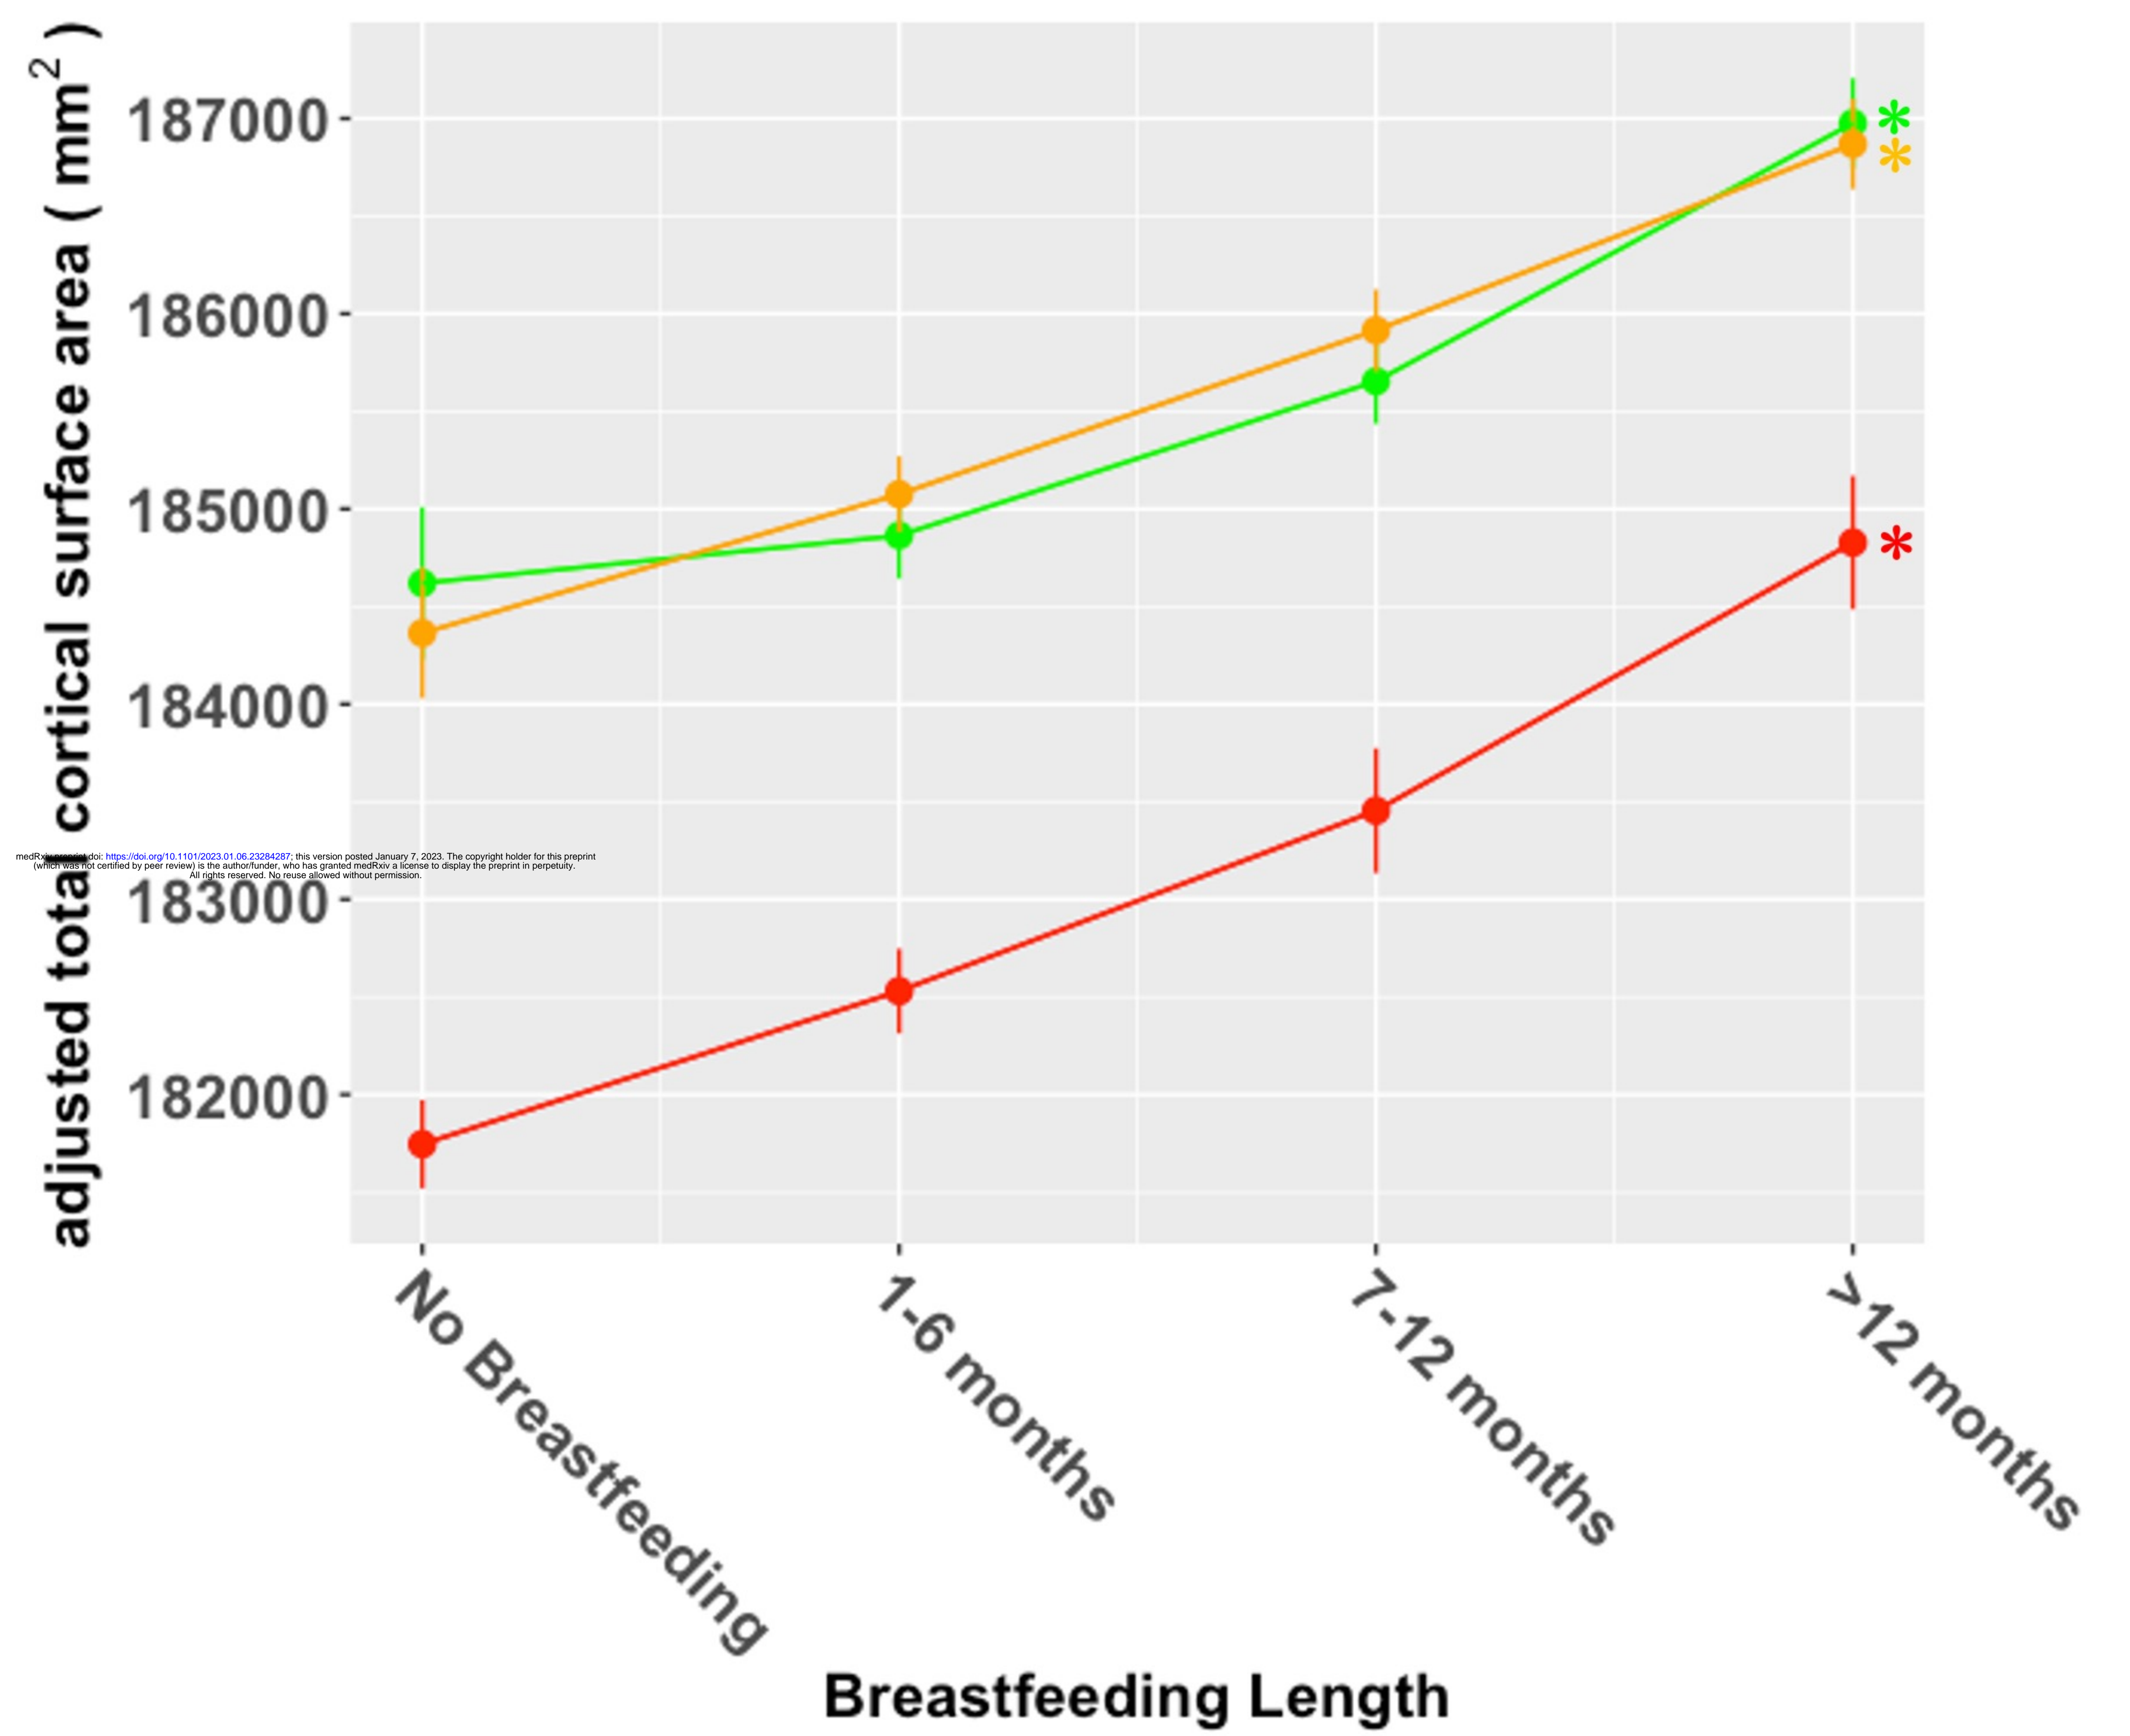**B**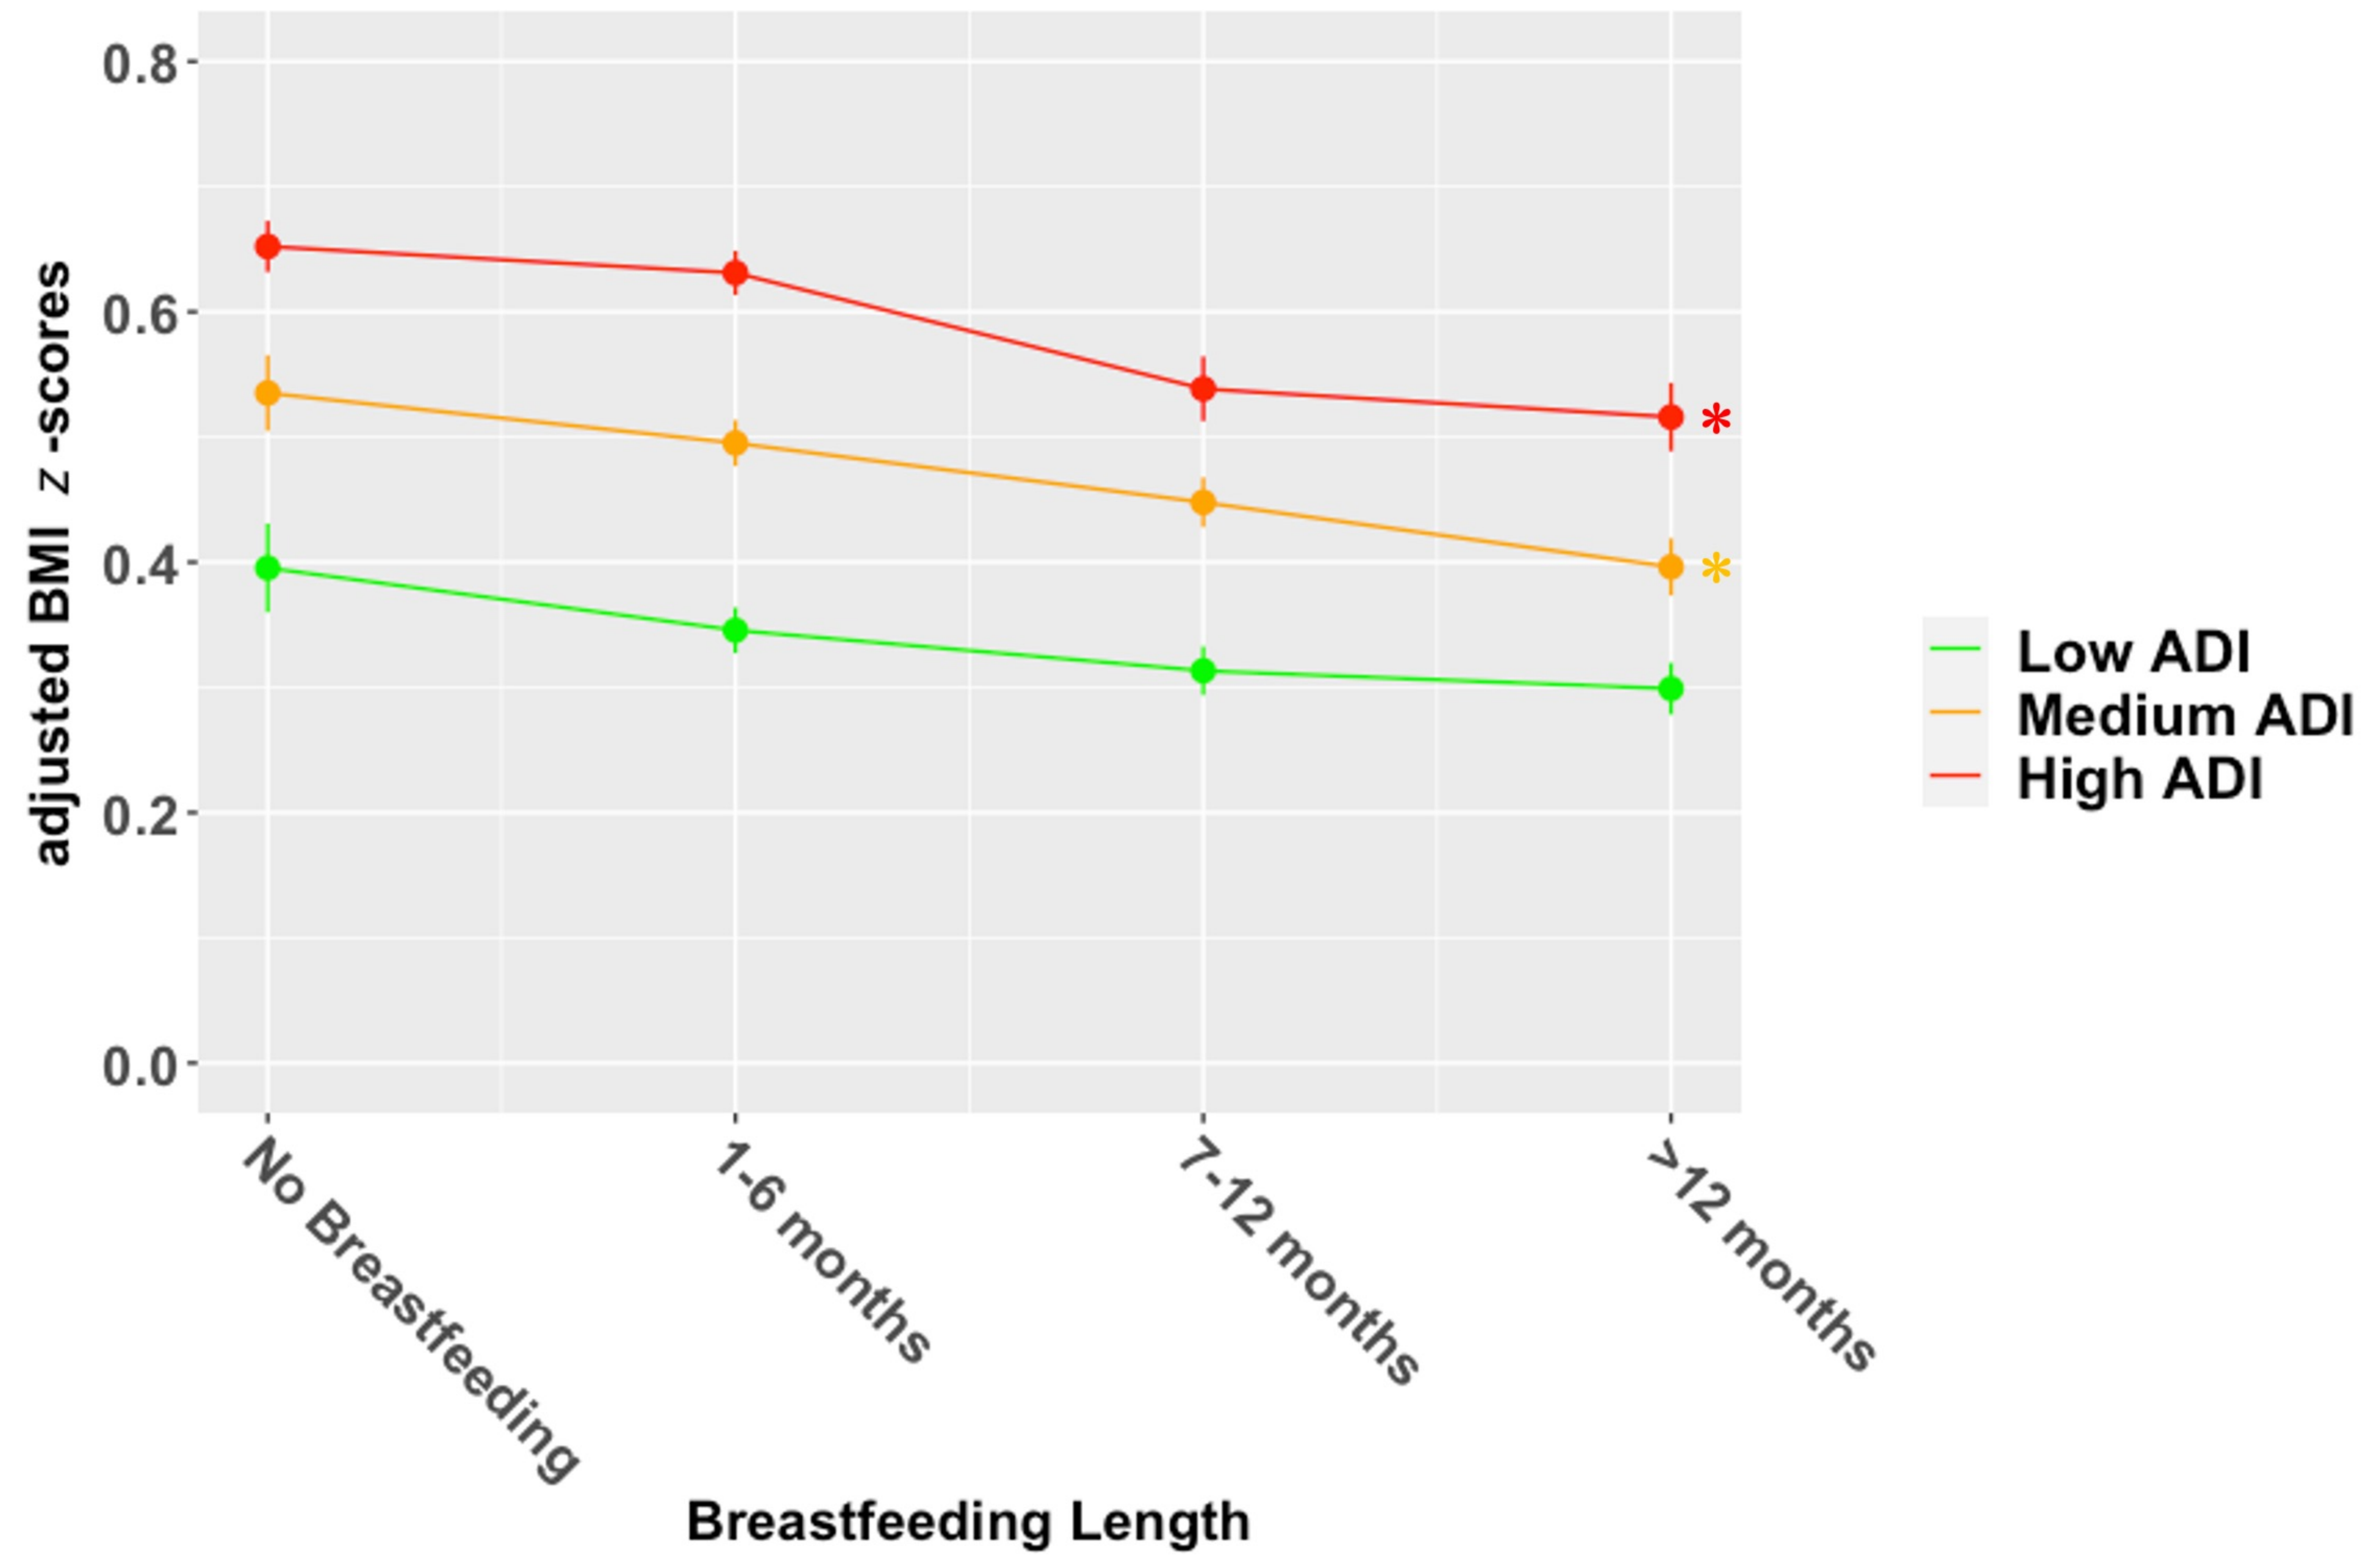

medRxiv preprint doi: <https://doi.org/10.1101/2023.01.06.23284287>; this version posted January 7, 2023. The copyright holder for this preprint (which was not certified by peer review) is the author/funder, who has granted medRxiv a license to display the preprint in perpetuity. All rights reserved. No reuse allowed without permission.
